# Supplementary material for: Cellulose Nanofibril/Carbon Nanomaterial Hybrid Aerogels for Adsorption Removal of Cationic and Anionic Organic Dyes
Source: MDPI journal article supplement (doi:10.3390/nano10010169), 2020-01-19
Supplement: s1 [file s1]

## Supplementary Material

# Cellulose Nanofibril/Carbon Nanomaterial Hybrid Aerogels for Adsorption Removal of Cationic and Anionic Organic Dyes

Zhencheng Yu <sup>1</sup>, Chuanshuang Hu <sup>1,\*</sup>, Anthony B. Dichiara <sup>2</sup>, Weihui Jiang <sup>1</sup> and Jin Gu <sup>1,\*</sup>

<sup>1</sup> College of Materials and Energy, South China Agricultural University, Guangzhou 510642, China; yuzansing2017@stu.scau.edu.cn (Z.Y.); 201820117385@mail.scut.edu.cn (W.J.)

<sup>2</sup> School of Environmental and Forest Sciences, University of Washington, Seattle, WA 98195, USA; abdichia@uw.edu

\* Correspondence: cshu@scau.edu.cn (C.H.); gujin@scau.edu.cn (J.G.);  
Tel.: +86-20-85282568 (C.H.); +86-20-85280319 (J.G.)

### Figures

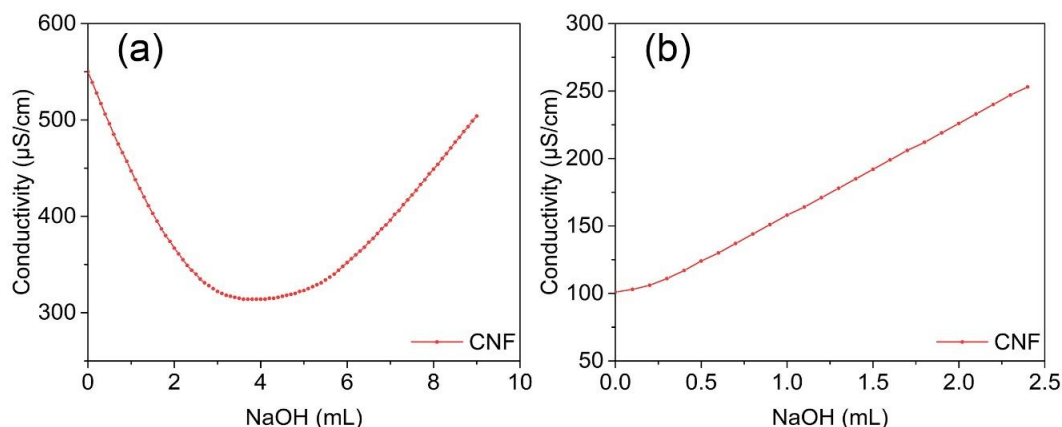

Figure S1 Conductometric titration curves of CNF (a) with HCl added and (b) without HCl added. In Figure a, before titration, hydrochloric acid of 1 mL (0.1N) was added to CNF suspension (0.1 wt%) of 50 mL to protonate the carboxyl groups. After that, the suspension was titrated with 0.02 M NaOH solution. The COOH+COO<sup>-</sup> content of the original CNF was calculated based on the NaOH amount added in the plateau region. In Figure b, the CNF suspension (0.1 wt%) of 50 mL was directly titrated with 0.02 M NaOH solution. The COOH content of the original CNF was calculated based on the NaOH amount added in the plateau region.

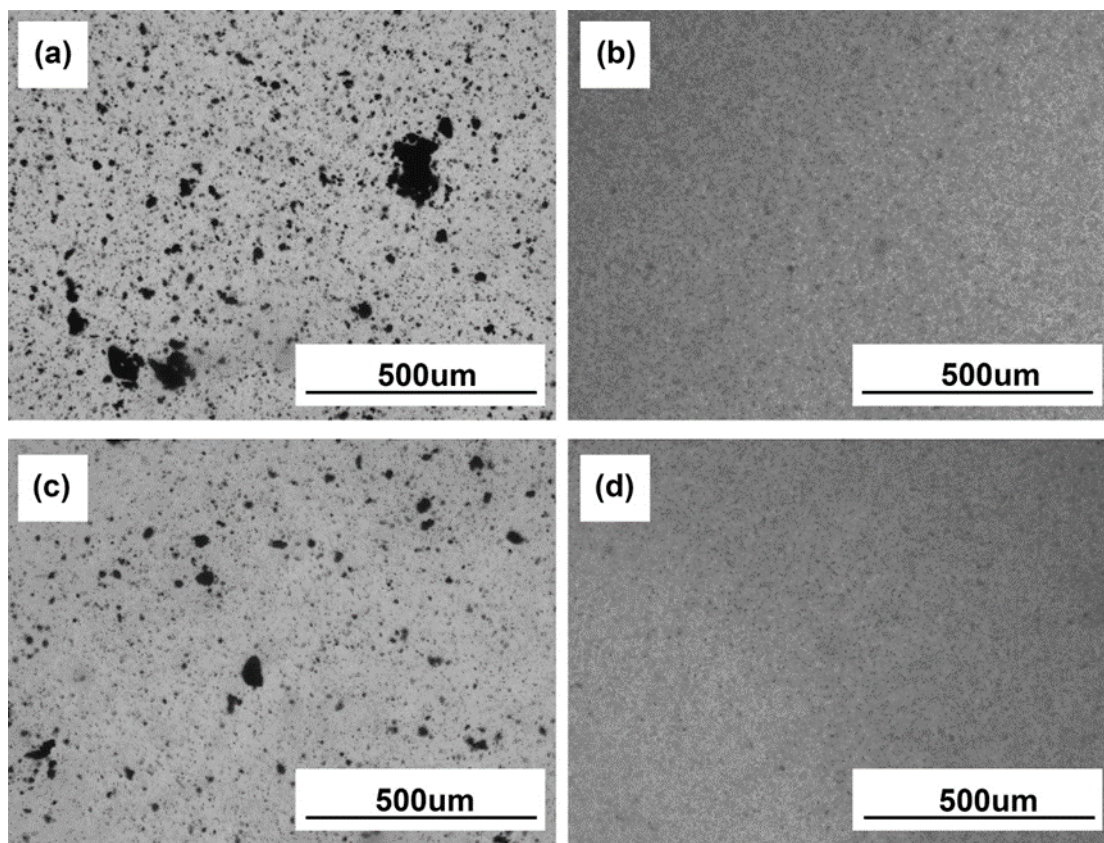

Figure S2. Optical micrographs of (a) CNF/CNT 3:1 after 5 min ultrasonic treatment; (b) CNF/CNT 3:1 after 30 min ultrasonic treatment; and (c) CNF/GnP 3:1 after 5 min ultrasonic treatment; (d) CNF/GnP 3:1 after 30 min ultrasonic treatment.

## Tables

Table S1. Chemical structure, molecular weight, maximum absorption wavelength and electrical property of methylene blue and Congo red.

| Dyes                      | Chemical formula                                                                   | Molar mass<br>(g mol <sup>-1</sup> ) | $\lambda_{\max}(\text{nm})$ | Electrical<br>property |
|---------------------------|------------------------------------------------------------------------------------|--------------------------------------|-----------------------------|------------------------|
| methylene<br>blue<br>(MB) | 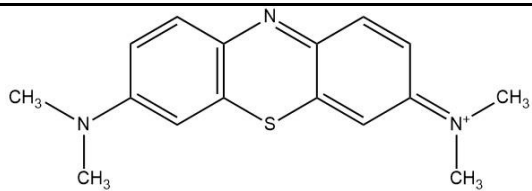  | 319.9                                | 664                         | Cationic               |
| Congo red<br>(CR)         |  | 696.7                                | 498                         | Anionic                |

Table S2. Group statistics of the final adsorption of MB.

|                                  | Type           | N | Mean     | Std. Deviation | Std. Error Mean |
|----------------------------------|----------------|---|----------|----------------|-----------------|
| The final<br>adsorption<br>of MB | CNF-GnP 3:1    | 3 | 1166.082 | 25.7257        | 14.8528         |
|                                  | CNF-CNT<br>3:1 | 3 | 1130.145 | 14.2890        | 8.2498          |

Table S3. Independent samples test of the final adsorption of MB onto CNF–GnP 3:1 and CNF–CNT 3:1. Whether these two materials had significantly different effects on the final adsorption of MB was investigated. Sig.=0.48>0.05, so the variances are equal. In this case, Sig.(2-tailed)=0.102>0.01. Therefore, the effect of these two materials on the final adsorption of MB had no significant difference.

|                            |                             | <i>Levene's Test for Equality of Variances</i> |      | <i>t-test for Equality of Means</i> |       |                |                 |                       |                                           |         |
|----------------------------|-----------------------------|------------------------------------------------|------|-------------------------------------|-------|----------------|-----------------|-----------------------|-------------------------------------------|---------|
|                            |                             | F                                              | Sig. | t                                   | df    | Sig.(2-tailed) | Mean Difference | Std. Error Difference | 95% Confidence Interval of the Difference |         |
|                            |                             |                                                |      |                                     |       |                |                 |                       | Lower                                     | Upper   |
| The final adsorption of MB | Equal variances assumed     | .604                                           | .480 | 2.115                               | 4     | .102           | 35.9370         | 16.9901               | -11.2350                                  | 83.1090 |
|                            | Equal variances not assumed |                                                |      | 2.115                               | 3.127 | .121           | 35.9370         | 16.9901               | -16.9136                                  | 88.7875 |

Table S4. Group statistics of the final adsorption of CR

|                            | Type        | N | Mean    | Std.Deviation | Std.Error Mean |
|----------------------------|-------------|---|---------|---------------|----------------|
| The final adsorption of CR | CNF–GnP 3:1 | 3 | 507.059 | 36.0784       | 20.8299        |
|                            | CNF–CNT 3:1 | 3 | 381.387 | 14.1596       | 8.1751         |

Table S5. Independent samples test of the final adsorption of CNF–GnP 3:1 and CNF–CNT 3:1to CR. Whether these two materials had significantly different effects on the final adsorption of CR was investigated. Sig. = 0.336 > 0.05, so the variances are equal. In this case, Sig.(2-tailed) = 0.005 < 0.01. Therefore, the effect of these two materials on the final adsorption of CR had significant difference.

|                                  |                                      | <i>Levene's Test<br/>for Equality<br/>of Variances</i> |      | <i>t-test for Equality of Means</i> |       |                | Mean<br>Difference | Std. Error<br>Difference | 95% Confidence<br>Interval of the<br>Difference |          |
|----------------------------------|--------------------------------------|--------------------------------------------------------|------|-------------------------------------|-------|----------------|--------------------|--------------------------|-------------------------------------------------|----------|
|                                  |                                      | F                                                      | Sig. | t                                   | df    | Sig.(2-tailed) |                    |                          | Lower                                           | Upper    |
| The final<br>adsorption<br>of MB | Equal<br>variances<br>assumed        | 1.191                                                  | .336 | 5.616                               | 4     | .005           | 125.6722           | 22.3767                  | 63.5445                                         | 187.7998 |
|                                  | Equal<br>variances<br>not<br>assumed |                                                        |      | 5.616                               | 2.602 | .016           | 125.6722           | 22.3767                  | 47.8795                                         | 203.4648 |
